# Supplementary material for: Toxic Habits: An Analysis of General Trends and Biases in Snake Venom Research
Source: MDPI journal article supplement (doi:10.3390/toxins14120884), 2022-12-17
Supplement: s1 [file s1]

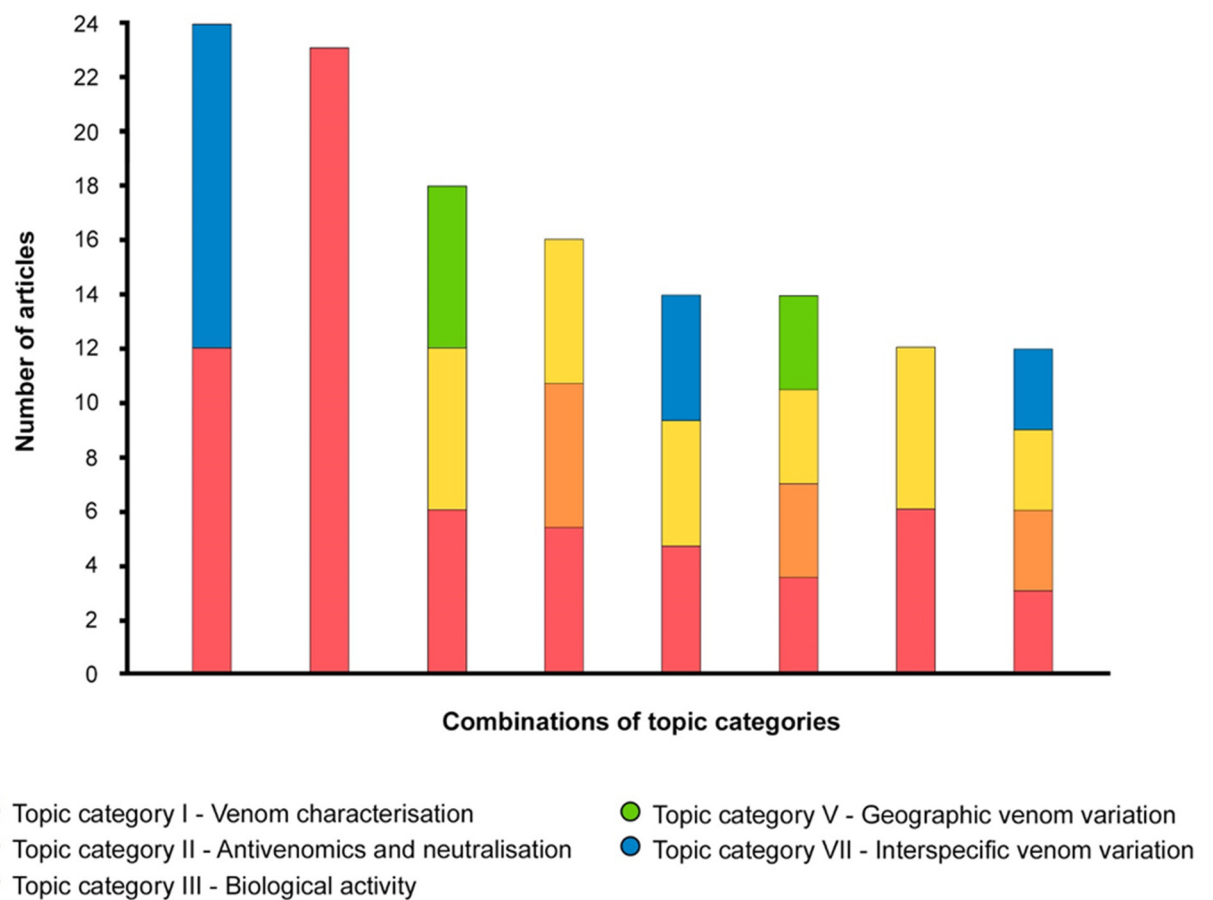

**Figure S1.** Information about the combinations of topic categories retrieved in the analysed articles.

The graph shows the eight most represented combinations in terms of number of articles.

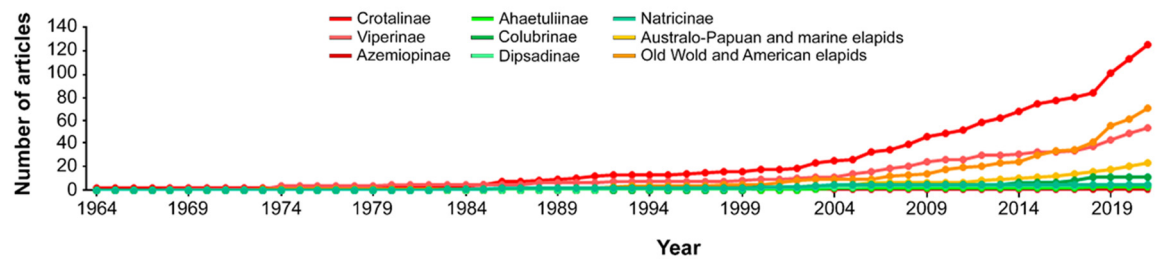

**Figure S2.** Chronological trends of the analysed publications, by snake subfamily/group considered. Notice the prevalence of Crotalinae, Viperinae, and Old World and American elapids over the other subfamilies/groups.
